# Supplementary material for: Reactions of a photoactivatable diazido Pt(iv) anticancer complex with a single-stranded oligodeoxynucleotide
Source: Royal Society of Chemistry journal article supplement (doi:10.1039/d0dt02208j), 2020-01-01
Supplement: d0dt02208j1.pdf [file d0dt02208j1.pdf]

## Electronic Supplementary Information

for

### Reactions of a photoactivatable diazido Pt(IV) anticancer complex with a single-stranded oligodeoxynucleotide

Zujun Liang,<sup>1</sup> Jiafan Lin,<sup>1</sup> Xianxian Gong,<sup>1</sup> Yiyu Cheng,<sup>1</sup> Chao Huang,<sup>1</sup> Jishuai Zhang,<sup>1</sup> Xiaoqin Wu,<sup>1</sup> Fuyi Wang,<sup>2</sup> Yao Zhao,<sup>2\*</sup> Kui Wu<sup>1\*</sup>

1. Key Laboratory of Hubei Province for Coal Conversion and New Carbon Materials; School of Chemistry and Chemical Engineering, Wuhan University of Science and Technology, Wuhan 430081, P. R. China

2. Beijing National Laboratory for Molecular Sciences; National Centre for Mass Spectrometry in Beijing; CAS Key Laboratory of Analytical Chemistry for Living Biosystems, Institute of Chemistry, Chinese Academy of Sciences, Beijing 100190, P. R. China

Correspondence: K. W.: [wukui@wust.edu.cn](mailto:wukui@wust.edu.cn); Y. Z.: [yaozhao@iccas.ac.cn](mailto:yaozhao@iccas.ac.cn).

**Table S1.** MS data for the reaction between Pt(IV) complex **1** and ODN **I** at a molar ratio of **1/I** = 1.0 after irradiated under blue light for 1 h (Charges for Pt moiety and the loss of protons from **I** for balancing the charges of the ions are omitted for clarity).

| Ion                                                                                                                                                                                                                                                                    | Formula                                                                                           | m/z<br>observed | m/z<br>calculated | Error<br>(ppm) |
|------------------------------------------------------------------------------------------------------------------------------------------------------------------------------------------------------------------------------------------------------------------------|---------------------------------------------------------------------------------------------------|-----------------|-------------------|----------------|
| { <b>I</b> + [Pt(N <sub>3</sub> )(py) <sub>2</sub> ]} <sup>6-</sup>                                                                                                                                                                                                    | C <sub>154</sub> H <sub>198</sub> N <sub>44</sub> O <sub>96</sub> P <sub>14</sub> Pt              | 688.962         | 688.961           | 1.45           |
| { <b>I</b> + [Pt(N <sub>3</sub> )(py) <sub>2</sub> ]} <sup>6-</sup>                                                                                                                                                                                                    | C <sub>164</sub> H <sub>207</sub> N <sub>49</sub> O <sub>96</sub> P <sub>14</sub> Pt <sub>2</sub> | 869.635         | 869.633           | 2.30           |
| [ <b>I</b> ] <sup>5-</sup>                                                                                                                                                                                                                                             | C <sub>144</sub> H <sub>189</sub> N <sub>39</sub> O <sub>96</sub> P <sub>14</sub>                 | 886.138         | 886.141           | -3.39          |
| { <b>I</b> + [Pt(N <sub>3</sub> )(py) <sub>2</sub> ]} <sup>6-</sup>                                                                                                                                                                                                    | C <sub>174</sub> H <sub>216</sub> N <sub>54</sub> O <sub>96</sub> P <sub>14</sub> Pt <sub>3</sub> | 935.305         | 935.320           | -16.04         |
| { <b>I</b> + [Pt(py) <sub>2</sub> ]} <sup>5-</sup>                                                                                                                                                                                                                     | C <sub>164</sub> H <sub>207</sub> N <sub>49</sub> O <sub>96</sub> P <sub>14</sub> Pt              | 956.349         | 956.352           | -3.14          |
| { <b>I</b> + [Pt(N <sub>3</sub> )(py) <sub>2</sub> ]} <sup>5-</sup>                                                                                                                                                                                                    | C <sub>154</sub> H <sub>198</sub> N <sub>44</sub> O <sub>96</sub> P <sub>14</sub> Pt              | 964.949         | 964.953           | -4.15          |
| { <b>I</b> + [Pt(py) <sub>2</sub> ] + [Pt(N <sub>3</sub> )(py) <sub>2</sub> ]} <sup>5-</sup>                                                                                                                                                                           | C <sub>164</sub> H <sub>206</sub> N <sub>46</sub> O <sub>96</sub> P <sub>14</sub> Pt <sub>2</sub> | 1035.159        | 1035.156          | 2.90           |
| { <b>I</b> + [Pt(N <sub>3</sub> )(py) <sub>2</sub> ]} <sup>5-</sup>                                                                                                                                                                                                    | C <sub>164</sub> H <sub>207</sub> N <sub>49</sub> O <sub>96</sub> P <sub>14</sub> Pt <sub>2</sub> | 1043.761        | 1043.766          | -4.79          |
| [ <b>I</b> ] <sup>4-</sup>                                                                                                                                                                                                                                             | C <sub>144</sub> H <sub>189</sub> N <sub>39</sub> O <sub>96</sub> P <sub>14</sub>                 | 1107.931        | 1107.930          | 0.90           |
| { <b>I</b> + [Pt(N <sub>3</sub> )(py) <sub>2</sub> ]} <sup>5-</sup>                                                                                                                                                                                                    | C <sub>174</sub> H <sub>216</sub> N <sub>54</sub> O <sub>96</sub> P <sub>14</sub> Pt <sub>3</sub> | 1122.573        | 1122.570          | 2.67           |
| { <b>I</b> + [Pt(py) <sub>2</sub> ]} <sup>4-</sup>                                                                                                                                                                                                                     | C <sub>154</sub> H <sub>198</sub> N <sub>41</sub> O <sub>96</sub> P <sub>14</sub> Pt              | 1195.686        | 1195.688          | -1.67          |
| { <b>I</b> + [Pt(N <sub>3</sub> )(py) <sub>2</sub> ]} <sup>4-</sup>                                                                                                                                                                                                    | C <sub>154</sub> H <sub>198</sub> N <sub>44</sub> O <sub>96</sub> P <sub>14</sub> Pt              | 1206.439        | 1206.445          | -4.97          |
| { <b>I</b> + [Pt(py) <sub>2</sub> ] + [Pt(N <sub>3</sub> )(py) <sub>2</sub> ]} <sup>4-</sup>                                                                                                                                                                           | C <sub>164</sub> H <sub>206</sub> N <sub>46</sub> O <sub>96</sub> P <sub>14</sub> Pt <sub>2</sub> | 1294.204        | 1294.204          | 0.00           |
| { <b>I</b> + [Pt(N <sub>3</sub> )(py) <sub>2</sub> ]} <sup>4-</sup>                                                                                                                                                                                                    | C <sub>164</sub> H <sub>207</sub> N <sub>49</sub> O <sub>96</sub> P <sub>14</sub> Pt <sub>2</sub> | 1304.953        | 1304.953          | 0.00           |
| { <b>I</b> + [Pt(py) <sub>2</sub> ] +<br>[Pt(N <sub>3</sub> )(py) <sub>2</sub> ]} <sup>4-</sup>                                                                                                                                                                        | C <sub>174</sub> H <sub>216</sub> N <sub>51</sub> O <sub>96</sub> P <sub>14</sub> Pt <sub>3</sub> | 1392.715        | 1392.711          | 2.87           |
| { <b>I</b> + [Pt(N <sub>3</sub> )(py) <sub>2</sub> ]} <sup>4-</sup>                                                                                                                                                                                                    | C <sub>174</sub> H <sub>216</sub> N <sub>54</sub> O <sub>96</sub> P <sub>14</sub> Pt <sub>3</sub> | 1403.473        | 1403.469          | 2.85           |
| [ <b>I</b> ] <sup>3-</sup>                                                                                                                                                                                                                                             | C <sub>144</sub> H <sub>189</sub> N <sub>39</sub> O <sub>96</sub> P <sub>14</sub>                 | 1477.242        | 1477.242          | 0.00           |
| [ <b>I</b> + Na] <sup>3-</sup>                                                                                                                                                                                                                                         | C <sub>144</sub> H <sub>188</sub> N <sub>39</sub> O <sub>96</sub> P <sub>14</sub> Na              | 1484.573        | 1484.570          | 2.02           |
| { <b>I</b> + [Pt(py) <sub>2</sub> ] <sub>2</sub> +<br>[Pt(N <sub>3</sub> )(py) <sub>2</sub> ]} <sup>4-</sup>                                                                                                                                                           | C <sub>184</sub> H <sub>224</sub> N <sub>56</sub> O <sub>96</sub> P <sub>14</sub> Pt <sub>4</sub> | 1491.226        | 1491.227          | -0.67          |
| { <b>I</b> + [Pt(N <sub>3</sub> )(py) <sub>2</sub> ]} <sup>4-</sup>                                                                                                                                                                                                    | C <sub>184</sub> H <sub>225</sub> N <sub>59</sub> O <sub>96</sub> P <sub>14</sub> Pt <sub>4</sub> | 1502.230        | 1502.234          | -2.66          |
| { <b>I</b> + [Pt(py) <sub>2</sub> ]} <sup>3-</sup>                                                                                                                                                                                                                     | C <sub>154</sub> H <sub>198</sub> N <sub>41</sub> O <sub>96</sub> P <sub>14</sub> Pt              | 1594.593        | 1594.587          | 3.76           |
| { <b>I</b> + [Pt(N <sub>3</sub> )(py) <sub>2</sub> ]} <sup>3-</sup>                                                                                                                                                                                                    | C <sub>154</sub> H <sub>198</sub> N <sub>44</sub> O <sub>96</sub> P <sub>14</sub> Pt              | 1608.932        | 1608.922          | 6.22           |
| { <b>I</b> + [Pt <sup>III</sup> (N <sub>3</sub> )(OH)(py) <sub>2</sub> ]} <sup>3-</sup>                                                                                                                                                                                | C <sub>154</sub> H <sub>199</sub> N <sub>44</sub> O <sub>97</sub> P <sub>14</sub> Pt              | 1614.594        | 1614.596          | 1.24           |
| {[ <b>I</b> + 3O] + [Pt <sup>III</sup> (OH)(py) <sub>2</sub> ]} <sup>3-</sup>                                                                                                                                                                                          | C <sub>154</sub> H <sub>198</sub> N <sub>41</sub> O <sub>100</sub> P <sub>14</sub> Pt             | 1616.261        | 1616.250          | 6.80           |
| {[ <b>I</b> + H <sub>2</sub> O + (OH) <sub>2</sub> ] +<br>[Pt(N <sub>3</sub> )(py) <sub>2</sub> ]} <sup>3-</sup> or {[ <b>I</b> + O +<br>(H <sub>2</sub> O) <sub>2</sub> ] + [Pt(N <sub>3</sub> )(py) <sub>2</sub> ]} <sup>3-</sup>                                    | C <sub>154</sub> H <sub>202</sub> N <sub>44</sub> O <sub>99</sub> P <sub>14</sub> Pt              | 1626.269        | 1626.266          | 1.84           |
| {[ <b>I</b> + (OH) <sub>2</sub> ] + [Pt <sup>III</sup> (N <sub>3</sub> ) <sub>2</sub> (py) <sub>2</sub> ]<br>+ Na} <sup>3-</sup> or {[ <b>I</b> + O + H <sub>2</sub> O] +<br>[Pt <sup>III</sup> (N <sub>3</sub> ) <sub>2</sub> (py) <sub>2</sub> ] + Na} <sup>3-</sup> | C <sub>154</sub> H <sub>200</sub> N <sub>47</sub> O <sub>98</sub> P <sub>14</sub> PtNa            | 1641.588        | 1641.594          | -3.65          |
| { <b>I</b> + [Pt(py) <sub>2</sub> ]} <sup>3-</sup>                                                                                                                                                                                                                     | C <sub>164</sub> H <sub>205</sub> N <sub>43</sub> O <sub>96</sub> P <sub>14</sub> Pt <sub>2</sub> | 1711.599        | 1711.602          | -1.75          |
| { <b>I</b> + [Pt(py) <sub>2</sub> ] + [Pt(N <sub>3</sub> )(py) <sub>2</sub> ]} <sup>3-</sup>                                                                                                                                                                           | C <sub>164</sub> H <sub>206</sub> N <sub>46</sub> O <sub>96</sub> P <sub>14</sub> Pt <sub>2</sub> | 1725.941        | 1725.938          | 1.74           |

|                                                                                                                                                                                                              |                                                                                                      |          |          |       |
|--------------------------------------------------------------------------------------------------------------------------------------------------------------------------------------------------------------|------------------------------------------------------------------------------------------------------|----------|----------|-------|
| {[I + H <sub>2</sub> O] + [Pt(py) <sub>2</sub> ] + [Pt(N <sub>3</sub> )(py) <sub>2</sub> ]} <sup>3-</sup>                                                                                                    | C <sub>164</sub> H <sub>209</sub> N <sub>46</sub> O <sub>97</sub> P <sub>14</sub> Pt <sub>2</sub>    | 1731.938 | 1731.944 | -3.46 |
| {[I + 2O] + [Pt(py) <sub>2</sub> ] + [Pt(N <sub>3</sub> )(py) <sub>2</sub> ]} <sup>3-</sup>                                                                                                                  | C <sub>164</sub> H <sub>206</sub> N <sub>46</sub> O <sub>98</sub> P <sub>14</sub> Pt <sub>2</sub>    | 1736.608 | 1736.602 | 3.46  |
| {I + [Pt(N <sub>3</sub> )(py) <sub>2</sub> ]} <sup>3-</sup>                                                                                                                                                  | C <sub>164</sub> H <sub>207</sub> N <sub>49</sub> O <sub>96</sub> P <sub>14</sub> Pt <sub>2</sub>    | 1740.284 | 1740.273 | 6.32  |
| {I + [Pt <sup>III</sup> (N <sub>3</sub> )(OH)(py) <sub>2</sub> ] + [Pt(N <sub>3</sub> )(py) <sub>2</sub> ]} <sup>3-</sup>                                                                                    | C <sub>164</sub> H <sub>208</sub> N <sub>49</sub> O <sub>97</sub> P <sub>14</sub> Pt <sub>2</sub>    | 1745.952 | 1745.945 | 4.01  |
| {I + [Pt(N <sub>3</sub> )(py) <sub>2</sub> ] <sub>2</sub> + Na} <sup>3-</sup>                                                                                                                                | C <sub>164</sub> H <sub>206</sub> N <sub>49</sub> O <sub>96</sub> P <sub>14</sub> Pt <sub>2</sub> Na | 1747.606 | 1747.602 | 2.29  |
| {[I + H <sub>2</sub> O] + [Pt <sup>III</sup> (N <sub>3</sub> )(OH)(py) <sub>2</sub> ]} <sup>3-</sup>                                                                                                         | C <sub>164</sub> H <sub>211</sub> N <sub>49</sub> O <sub>99</sub> P <sub>14</sub> Pt <sub>2</sub>    | 1757.617 | 1757.617 | 0.00  |
| {[I + 4O] + [Pt <sup>III</sup> (N <sub>3</sub> )(OH)(py) <sub>2</sub> ]} <sup>3-</sup>                                                                                                                       | C <sub>164</sub> H <sub>209</sub> N <sub>49</sub> O <sub>102</sub> P <sub>14</sub> Pt <sub>2</sub>   | 1772.937 | 1772.938 | -0.56 |
| {I + [Pt(py) <sub>2</sub> ] <sub>2</sub> + [Pt(N <sub>3</sub> )(py) <sub>2</sub> ]} <sup>3-</sup>                                                                                                            | C <sub>174</sub> H <sub>215</sub> N <sub>48</sub> O <sub>96</sub> P <sub>14</sub> Pt <sub>3</sub>    | 1843.288 | 1843.281 | 3.80  |
| {I + [Pt(py) <sub>2</sub> ] + [Pt(N <sub>3</sub> )(py) <sub>2</sub> ]} <sup>3-</sup>                                                                                                                         | C <sub>174</sub> H <sub>216</sub> N <sub>51</sub> O <sub>96</sub> P <sub>14</sub> Pt <sub>3</sub>    | 1857.297 | 1857.289 | 4.31  |
| {[I + O] + [Pt(py) <sub>2</sub> ] + [Pt(N <sub>3</sub> )(py) <sub>2</sub> ]} <sup>3-</sup>                                                                                                                   | C <sub>174</sub> H <sub>216</sub> N <sub>51</sub> O <sub>97</sub> P <sub>14</sub> Pt <sub>3</sub>    | 1862.957 | 1862.953 | 2.15  |
| {I + [Pt(N <sub>3</sub> )(py) <sub>2</sub> ]} <sup>3-</sup>                                                                                                                                                  | C <sub>174</sub> H <sub>216</sub> N <sub>54</sub> O <sub>96</sub> P <sub>14</sub> Pt <sub>3</sub>    | 1871.633 | 1871.625 | 4.27  |
| {I + [Pt <sup>III</sup> (N <sub>3</sub> )(OH)(py) <sub>2</sub> ] + [Pt(N <sub>3</sub> )(py) <sub>2</sub> ]} <sup>3-</sup>                                                                                    | C <sub>174</sub> H <sub>217</sub> N <sub>54</sub> O <sub>97</sub> P <sub>14</sub> Pt <sub>3</sub>    | 1877.307 | 1877.297 | 5.33  |
| {[I + H <sub>2</sub> O] + [Pt <sup>III</sup> (N <sub>3</sub> )(OH)(py) <sub>2</sub> ] + [Pt(N <sub>3</sub> )(py) <sub>2</sub> ]} <sup>3-</sup>                                                               | C <sub>174</sub> H <sub>220</sub> N <sub>54</sub> O <sub>99</sub> P <sub>14</sub> Pt <sub>3</sub>    | 1888.973 | 1888.961 | 6.35  |
| {I + [Pt(py) <sub>2</sub> ] + [Pt(N <sub>3</sub> )(py) <sub>2</sub> ]} <sup>3-</sup>                                                                                                                         | C <sub>184</sub> H <sub>224</sub> N <sub>56</sub> O <sub>96</sub> P <sub>14</sub> Pt <sub>4</sub>    | 1988.986 | 1988.969 | 8.55  |
| {I + [Pt(N <sub>3</sub> )(py) <sub>2</sub> ]} <sup>3-</sup>                                                                                                                                                  | C <sub>184</sub> H <sub>225</sub> N <sub>59</sub> O <sub>96</sub> P <sub>14</sub> Pt <sub>4</sub>    | 2003.325 | 2003.313 | 5.99  |
| {[I + (OH) <sub>2</sub> + H <sub>2</sub> O] + [Pt(N <sub>3</sub> )(py) <sub>2</sub> ]} <sup>3-</sup> or {[I + O + (H <sub>2</sub> O) <sub>2</sub> ] + [Pt(N <sub>3</sub> )(py) <sub>2</sub> ]} <sup>3-</sup> | C <sub>184</sub> H <sub>229</sub> N <sub>59</sub> O <sub>99</sub> P <sub>14</sub> Pt <sub>4</sub>    | 2020.665 | 2020.648 | 8.41  |
| {[I] <sub>2</sub> + [Pt(py) <sub>2</sub> ] + [Pt(N <sub>3</sub> )(py) <sub>2</sub> ]} <sup>5-</sup>                                                                                                          | C <sub>328</sub> H <sub>413</sub> N <sub>95</sub> O <sub>192</sub> P <sub>28</sub> Pt <sub>4</sub>   | 2080.143 | 2080.133 | 4.81  |
| {I + [Pt(N <sub>3</sub> )(py) <sub>2</sub> ]} <sup>5-</sup>                                                                                                                                                  | C <sub>328</sub> H <sub>414</sub> N <sub>98</sub> O <sub>192</sub> P <sub>28</sub> Pt <sub>4</sub>   | 2088.748 | 2088.734 | 6.70  |
| {I + [Pt(py) <sub>2</sub> ] + [Pt(N <sub>3</sub> )(py) <sub>2</sub> ]} <sup>3-</sup>                                                                                                                         | C <sub>194</sub> H <sub>233</sub> N <sub>61</sub> O <sub>96</sub> P <sub>14</sub> Pt <sub>5</sub>    | 2120.340 | 2120.320 | 9.43  |
| {I + [Pt(N <sub>3</sub> )(py) <sub>2</sub> ]} <sup>3-</sup>                                                                                                                                                  | C <sub>194</sub> H <sub>234</sub> N <sub>64</sub> O <sub>96</sub> P <sub>14</sub> Pt <sub>5</sub>    | 2134.681 | 2134.656 | 11.71 |
| {[I + (OH) <sub>2</sub> + H <sub>2</sub> O] + [Pt(N <sub>3</sub> )(py) <sub>2</sub> ]} <sup>3-</sup> or {[I + O + (H <sub>2</sub> O) <sub>2</sub> ] + [Pt(N <sub>3</sub> )(py) <sub>2</sub> ]} <sup>3-</sup> | C <sub>194</sub> H <sub>238</sub> N <sub>64</sub> O <sub>99</sub> P <sub>14</sub> Pt <sub>5</sub>    | 2152.017 | 2152.000 | 7.90  |
| {I + [Pt(N <sub>3</sub> )(py) <sub>2</sub> ]} <sup>5-</sup>                                                                                                                                                  | C <sub>348</sub> H <sub>432</sub> N <sub>108</sub> O <sub>192</sub> P <sub>28</sub> Pt <sub>6</sub>  | 2246.381 | 2246.352 | 12.91 |

**Table S2.** Fragment ions observed by MS/MS analysis in negative-ion mode of mono-platinated **I** ( $[\mathbf{I} + \mathbf{1}']^{3-}$ ,  $m/z$  1608.932) produced by the reaction of complex **1** with ODN **I** at 310 K after irradiation under blue light for 1 h. (Charges for Pt moiety and the loss of protons from **I** for balancing the charges of the ions are omitted for clarity).  $\mathbf{1}' = [\text{Pt}(\text{N}_3)(\text{py})_2]^+$ .

| Fragments                                                   | $m/z^a$ observed<br>(calculated) | Fragments                                                                                | $m/z^a$ observed<br>(calculated) |
|-------------------------------------------------------------|----------------------------------|------------------------------------------------------------------------------------------|----------------------------------|
| $w_1^-$                                                     | 306.045 (306.047)                | $[\text{a}_2 - \text{T}_2^b]^-$                                                          | 386.068 (386.078)                |
| $w_2^-$                                                     | 610.087 (610.094)                | $\text{a}_2^-$                                                                           | 512.106 (512.117)                |
| $w_3^-$                                                     | 899.136 (899.141)                | $[\text{a}_3 - \text{C}_3^b]^-$                                                          | 690.117 (690.125)                |
| $w_4^-$                                                     | 1203.182 (1203.188)              | $\{[\text{a}_3 - \text{C}_3] + \mathbf{1}'\}^-$                                          | 1084.163 (1084.172)              |
| $w_5^-$                                                     | 1507.229 (1507.234)              | $[\text{a}_4 - \text{T}_4]^-$                                                            | 979.152 (979.168)                |
| $w_5^{2-}$                                                  | 753.100 (753.117)                | $\text{a}_4^-$                                                                           | 1105.212 (1105.211)              |
| $[\text{w}_5 + \mathbf{1}']^-$                              | 1902.280 (1902.289)              | $[\text{a}_5 - \text{C}_5]^-$                                                            | 1283.208 (1283.211)              |
| $w_6^{2-}$                                                  | 897.630 (897.633)                | $\{[\text{a}_5 - \text{C}_5] + \mathbf{1}'\}^-$                                          | 1678.269 (1678.266)              |
| $w_7^-$                                                     | 2100.332 (2100.328)              | $[\text{a}_8 - \text{G}_8^b]^-$                                                          | 2180.369 (2180.352)              |
| $w_7^{2-}$                                                  | 1049.656 (1049.656)              | $[\text{a}_8 - \text{G}_8]^{2-}$                                                         | 1089.669 (1089.672)              |
| $[\text{w}_7 + \mathbf{1}']^{2-}$                           | 1247.175 (1247.188)              | $\{[\text{a}_8 - \text{G}_8] + \mathbf{1}'\}^{2-}$                                       | 1287.186 (1287.195)              |
| $w_{10}^-$                                                  | 1518.731 (1518.734)              | $[\text{a}_{10} - \text{C}_{10}]^{2-}$                                                   | 1406.720 (1406.727)              |
| $[\text{w}_{10} + \mathbf{1}']^{2-}$                        | 1715.761 (1715.758)              | $\{[\text{a}_{10} - \text{C}_{10}] + \mathbf{1}'\}^{2-}$                                 | 1603.748 (1603.750)              |
| $w_{12}^{2-}$                                               | 1815.267 (1815.281)              | $[\text{a}_{13} - \text{C}_{13}]^{2-}$                                                   | 1855.293 (1855.290)              |
| $[\text{w}_{12} + \mathbf{1}']^{2-}$                        | 2012.315 (2012.305)              | $\{[\text{a}_{13} - \text{C}_{13}] + \mathbf{1}'\}^{2-}$                                 | 2052.337 (2052.333)              |
| $[\text{w}_{14} + \mathbf{1}']^{3-}$                        | 1539.235 (1539.234)              | $\{[\text{a}_{15} - \text{C}_{15}] + \mathbf{1}'\}^{2-}$                                 | 1565.909 (1565.906)              |
| $\{\text{w}_{14} + [\mathbf{1}' - \text{N}_3]\}^{3-}$       | 1524.899 (1524.891)              |                                                                                          |                                  |
| $\{\text{w}_{14} + [\mathbf{1}' - \text{py}]\}^{3-}$        | 1512.887 (1512.883)              |                                                                                          |                                  |
| $[\text{w}_{14} + \mathbf{1}' - \text{C}^c]^{3-}$           | 1502.217 (1502.219)              |                                                                                          |                                  |
| $[\text{w}_{14} + \mathbf{1}' - \text{G}^c]^{3-}$           | 1488.886 (1488.883)              |                                                                                          |                                  |
| $[\mathbf{I} + \mathbf{1}']^{3-}$                           | 1608.926 (1608.922)              | $\{[\mathbf{I} + \mathbf{1}'] - \text{N}_3\}^{3-}$                                       | 1594.588 (1594.586)              |
| $[\mathbf{I} - \text{G}]^{3-}$                              | 1426.890 (1426.891)              | $\{[\mathbf{I} + \mathbf{1}'] - \text{py}\}^{3-}$                                        | 1582.581 (1582.578)              |
| $\{[\mathbf{I} + \mathbf{1}'] - \text{C}\}^{3-}$            | 1571.912 (1571.904)              | $\{[\mathbf{I} + \mathbf{1}'] - \text{N}_2 - \text{py}\}^{3-}$                           | 1573.245 (1571.242)              |
| $\{[\mathbf{I} + \mathbf{1}'] - \text{G}\}^{3-}$            | 1558.241 (1558.242)              | $\{[\mathbf{I} + \mathbf{1}'] - \text{py} - \text{C}\}^{3-}$                             | 1545.566 (1545.563)              |
| $\{[\mathbf{I} + \mathbf{1}'] - 2\text{C}\}^{3-}$           | 1534.894 (1534.898)              | $\{[\mathbf{I} + \mathbf{1}'] - \text{py} - \text{G}\}^{3-}$                             | 1532.228 (1532.227)              |
| $\{[\mathbf{I} + \mathbf{1}'] - \text{G} - \text{C}\}^{3-}$ | 1521.562 (1521.563)              |                                                                                          |                                  |
| <b>Internal fragments<sup>d</sup></b>                       |                                  |                                                                                          |                                  |
| $[\text{T}_6:\text{T}_9]^-$                                 | 1418.181 (1418.188)              | $[\text{T}_x:\text{T}_x]^-$ (x=2,4,9,12,14)                                              | 481.035 (481.039)                |
| $\{[\text{T}_6:\text{T}_9] - \text{G}\}^-$                  | 1267.127 (1267.144)              | $[\text{T}_4:\text{T}_7]^-/[\text{T}_9:\text{T}_{12}]^-/[\text{T}_{11}:\text{T}_{14}]^-$ | 1378.177 (1378.180)              |

|                                                           |                     |                                                              |                     |
|-----------------------------------------------------------|---------------------|--------------------------------------------------------------|---------------------|
| $[T_2:T_4]^-/[C_5:T_7]^-/[C_{10}:T_{12}]^-$               | 1074.127 (1074.133) | $\{[T_4:T_7]/[T_9:T_{12}]/[T_{11}:T_{14}] + \mathbf{1}'\}^-$ | 1773.223 (1773.234) |
| $\{[T_2:T_4]/[C_5:T_7]/[C_{10}:T_{12}] + \mathbf{1}'\}^-$ | 1468.187 (1468.188) | $[T_6:T_7]^-/[T_{11}:T_{12}]^-$                              | 785.079 (785.086)   |
| $[T_2:T_7]^{2-}/[T_9:T_{14}]^{2-}$                        | 985.129 (985.133)   | $\{[T_2:T_{14}] + \mathbf{1}'\}^{3-}$                        | 1496.219 (1496.211) |
| $[T_2:T_7]^-/[T_9:T_{14}]^-$                              | 1971.275 (1971.273) | $[T_2:T_9]^{2-}/[C_5:T_{12}]^{2-}$                           | 1302.184 (1302.180) |
| $\{[T_2:T_7]/[T_9:T_{14}] + \mathbf{1}'\}^{2-}$           | 1182.656 (1182.656) | $\{[T_2:T_9]/[C_5:T_{12}] + \mathbf{1}'\}^{2-}$              | 1499.206 (1499.211) |
| $[T_2:T_{12}]^{2-}/[T_4:T_{14}]^{2-}$                     | 1750.765 (1750.750) | $\{[T_4:T_9] - G\}^-$                                        | 1860.234 (1860.227) |
| $\{[T_2:T_{12}]/[T_4:T_{14}] + \mathbf{1}'\}^{2-}$        | 1947.790 (1947.781) | $[T_4:T_{12}]^{2-}/[T_6:T_{14}]^{2-}$                        | 1454.210 (1454.203) |
|                                                           |                     | $\{[T_4:T_{12}]/[T_6:T_{14}] + \mathbf{1}'\}^{2-}$           | 1651.226 (1651.234) |

<sup>a</sup>The most abundant isotopic mass-to-charge ratio.

<sup>b</sup>T<sub>n</sub>, C<sub>n</sub> and G<sub>n</sub> represent the loss of a cytosine and a guanine base, respectively, followed by elimination of a H<sub>2</sub>O molecule to form a furan ring, n indicates the position of the base.

<sup>c</sup>C and G represent the neutral loss of a cytosine and a guanine base, respectively.

<sup>d</sup>The internal fragment B<sub>m</sub>·B<sub>n</sub> results from fragmentation at both the a- and w-sites, having a phosphate group at the 5'-terminus and a furan ring at the 3'-terminus.

**Table S3.** Fragment ions observed by MS/MS analysis in negative-ion mode of di-platinated **I** ( $[\mathbf{I} + \mathbf{1}'_2]^{3-}$ ,  $m/z$  1740.284) produced by the reaction of complex **1** with ODN **I** at 310 K after irradiation under blue light for 1 h. (Charges for Pt moiety and the loss of protons from **I** for balancing the charges of the ions are omitted for clarity).  $\mathbf{1}' = [\text{Pt}(\text{N}_3)(\text{py})_2]^+$ .

| Fragments                                                      | $m/z^a$ observed<br>(calculated) | Fragments                                                    | $m/z^a$ observed<br>(calculated) |
|----------------------------------------------------------------|----------------------------------|--------------------------------------------------------------|----------------------------------|
| $w_1^-$                                                        | 306.045 (306.047)                | $[\text{a}_2 - \text{T}_2^{\text{b}}]^-$                     | 386.068 (386.078)                |
| $w_2^-$                                                        | 610.093 (610.094)                | $\text{a}_2^-$                                               | 512.119 (512.117)                |
| $w_3^-$                                                        | 899.136 (899.141)                | $[\text{a}_3 - \text{C}_3^{\text{b}}]^-$                     | 690.117 (690.125)                |
| $w_4^-$                                                        | 1203.182 (1203.188)              | $\{[\text{a}_3 - \text{C}_3] + \mathbf{1}'\}^-$              | 1084.168 (1084.172)              |
| $w_5^-$                                                        | 1507.237 (1507.234)              | $[\text{a}_4 - \text{T}_4]^-$                                | 979.159 (979.168)                |
| $w_5^{2-}$                                                     | 753.107 (753.117)                | $\text{a}_4^-$                                               | 1105.212 (1105.211)              |
| $[\text{w}_5 + \mathbf{1}']^-$                                 | 1902.298 (1902.289)              | $[\text{a}_5 - \text{C}_5]^-$                                | 1283.208 (1283.211)              |
| $w_6^{2-}$                                                     | 897.630 (897.633)                | $\{[\text{a}_5 - \text{C}_5] + \mathbf{1}'\}^-$              | 1678.261 (1678.266)              |
| $w_7^{2-}$                                                     | 1049.656 (1049.656)              | $[\text{a}_8 - \text{G}_8^{\text{b}}]^-$                     | 2180.379 (2180.352)              |
| $[\text{w}_7 + \mathbf{1}']^{2-}$                              | 1247.182 (1247.188)              | $[\text{a}_8 - \text{G}_8]^{2-}$                             | 1089.669 (1089.672)              |
| $w_7^-$                                                        | 2100.351 (2100.328)              | $\{[\text{a}_8 - \text{G}_8] + \mathbf{1}'\}^{2-}$           | 1287.193 (1287.195)              |
| $[\text{w}_{10} + \mathbf{1}']^{2-}$                           | 1715.769 (1715.758)              | $\{[\text{a}_{10} - \text{C}_{10}] + \mathbf{1}'\}^{2-}$     | 1603.748 (1603.750)              |
| $[\text{w}_{10} + \mathbf{1}'_2]^{2-}$                         | 1912.795 (1912.781)              | $\{[\text{a}_{10} - \text{C}_{10}] + \mathbf{1}'_2\}^{2-}$   | 1800.775 (1800.773)              |
| $[\text{w}_{12} + \mathbf{1}']^{2-}$                           | 2012.333 (2012.305)              | $\{[\text{a}_{13} - \text{C}_{13}] + \mathbf{1}'\}^{2-}$     | 2052.330 (2052.333)              |
| $[\text{w}_{12} + \mathbf{1}'_2]^{2-}$                         | 2209.858 (2209.828)              | $\{[\text{a}_{13} - \text{C}_{13}] + \mathbf{1}'_2\}^{2-}$   | 2249.848 (2249.844)              |
| $[\text{w}_{14} + \mathbf{1}']^{3-}$                           | 1539.235 (1539.234)              | $\{[\text{a}_{15} - \text{C}_{15}] + \mathbf{1}'_2\}^{3-}$   | 1697.276 (1697.258)              |
| $\{[\text{w}_{14} + \mathbf{1}'] - \text{C}^{\text{c}}\}^{3-}$ | 1502.217 (1502.219)              |                                                              |                                  |
| $\{[\text{w}_{14} + \mathbf{1}'] - \text{G}^{\text{c}}\}^{3-}$ | 1488.894 (1488.883)              |                                                              |                                  |
| $[\text{w}_{14} + \mathbf{1}'_2]^{3-}$                         | 1670.591 (1670.586)              |                                                              |                                  |
| $\{[\text{w}_{14} + \mathbf{1}'_2] - \text{py}\}^{3-}$         | 1644.242 (1644.234)              |                                                              |                                  |
| $\{[\text{w}_{14} + \mathbf{1}'_2] - \text{C}\}^{3-}$          | 1633.582 (1633.570)              |                                                              |                                  |
| $\{[\text{w}_{14} + \mathbf{1}'_2] - \text{G}\}^{3-}$          | 1620.231 (1620.234)              |                                                              |                                  |
| $[\mathbf{I} + \mathbf{1}'_2]^{3-}$                            | 1740.287 (1740.273)              | $\{[\mathbf{I} + \mathbf{1}'_2] - \text{G}\}^{3-}$           | 1689.934 (1689.930)              |
| $\{[\mathbf{I} + \mathbf{1}'_2] - \text{N}_3\}^{3-}$           | 1725.953 (1725.938)              | $\{[\mathbf{I} + \mathbf{1}'] - \text{N}_3\}^{3-}$           | 1594.590 (1594.586)              |
| $\{[\mathbf{I} + \mathbf{1}'_2] - \text{py}\}^{3-}$            | 1713.935 (1713.930)              | $\{[\mathbf{I} + \mathbf{1}'] - \text{C}\}^{3-}$             | 1571.906 (1571.904)              |
| $\{[\mathbf{I} + \mathbf{1}'_2] - \text{C}\}^{3-}$             | 1703.271 (1703.258)              | $\{[\mathbf{I} + \mathbf{1}'] - \text{G}\}^{3-}$             | 1558.249 (1558.242)              |
| $\{[\mathbf{I} + \mathbf{1}'_2] - 2\text{py}\}^{3-}$           | 1687.599 (1687.578)              | $\{[\mathbf{I} + \mathbf{1}'] - \text{py} - \text{G}\}^{3-}$ | 1532.222 (1532.227)              |
| $\{[\mathbf{I} + \mathbf{1}'_2] - \text{C} - \text{py}\}^{3-}$ | 1676.917 (1676.914)              | $\{[\mathbf{I} + \mathbf{1}'] - \text{G} - \text{C}\}^{3-}$  | 1521.564 (1521.563)              |
| <b>Internal fragments<sup>d</sup></b>                          |                                  |                                                              |                                  |
| $[\text{T}_6; \text{T}_9]^-$                                   | 1418.181 (1418.188)              | $[\text{T}_x; \text{T}_x]^-$ (x=2,4,9,12,14)                 | 481.035 (481.039)                |

|                                                                       |                     |                                                                          |                     |
|-----------------------------------------------------------------------|---------------------|--------------------------------------------------------------------------|---------------------|
| $\{[T_6:T_9] - G\}^-$                                                 | 1267.127 (1267.144) | $[T_4:T_7]^-/[T_9:T_{12}]^-/$<br>$[T_{11}:T_{14}]^-$                     | 1378.177 (1378.180) |
| $[T_2:T_4]^-/[C_5:T_7]^-/$<br>$[C_{10}:T_{12}]^-$                     | 1074.127 (1074.133) | $\{[T_4:T_7]^-/[T_9:T_{12}]^-/$<br>$[T_{11}:T_{14}]^- + \mathbf{1}'\}^-$ | 1773.250 (1773.234) |
| $\{[T_2:T_4]^-/[C_5:T_7]^-/$<br>$[C_{10}:T_{12}]^- + \mathbf{1}'\}^-$ | 1468.187 (1468.188) | $[T_6:T_7]^-/[T_{11}:T_{12}]^-$                                          | 785.084 (785.086)   |
| $[T_2:T_7]^{2-}/[T_9:T_{14}]^{2-}$                                    | 985.129 (985.133)   | $\{[T_2:T_{14}]^- + \mathbf{1}'_2\}^{3-}$                                | 1627.570 (1627.563) |
| $[T_2:T_7]^-/[T_9:T_{14}]^-$                                          | 1971.284 (1971.273) | $[T_6:T_{14}]^{2-}$                                                      | 1454.178 (1454.203) |
| $\{[T_2:T_7]^-/[T_9:T_{14}]^- +$<br>$\mathbf{1}'\}^{2-}$              | 1182.642 (1182.656) | $\{[T_4:T_9] - G\}^-$                                                    | 1860.234 (1860.227) |
| $\{[T_2:T_9]^-/[C_5:T_{12}]^- +$<br>$\mathbf{1}'\}^{2-}$              | 1499.222 (1499.211) | $\{[T_2:T_{12}]^-/[T_4:T_{14}]^- +$<br>$\mathbf{1}'_2\}^{2-}$            | 2145.318 (2145.305) |

<sup>a</sup>The most abundant isotopic mass-to-charge ratio.

<sup>b</sup>T<sub>n</sub>, C<sub>n</sub> and G<sub>n</sub> represent the loss of a cytosine and a guanine base, respectively, followed by elimination of a H<sub>2</sub>O molecule to form a furan ring, n indicates the position of the base.

<sup>c</sup>C and G represent the neutral loss of a cytosine and a guanine base, respectively.

<sup>d</sup>The internal fragment B<sub>m</sub>:B<sub>n</sub> results from fragmentation at both the a- and w-sites, having a phosphate group at the 5'-terminus and a furan ring at the 3'-terminus.

**Table S4.** Fragment ions observed by MS/MS analysis in negative-ion mode of tri-platinated **I** ( $[\mathbf{I} + \mathbf{1}'_3]^{3-}$ ,  $m/z$  1857.297) produced by the reaction of complex **1** with ODN **I** at 310 K after irradiation under blue light for 1 h. (Charges for Pt moiety and the loss of protons from **I** for balancing the charges of the ions are omitted for clarity).

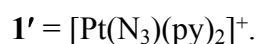

| Fragments                                                                                  | $m/z^a$ observed<br>(calculated) | Fragments                                                              | $m/z^a$ observed<br>(calculated) |
|--------------------------------------------------------------------------------------------|----------------------------------|------------------------------------------------------------------------|----------------------------------|
| $w_1^-$                                                                                    | 306.042 (306.047)                | $[\text{a}_2 - \text{T}_2^b]^-$                                        | 386.073 (386.078)                |
| $w_2^-$                                                                                    | 610.087 (610.094)                | $[\text{a}_3 - \text{C}_3^b]^-$                                        | 690.111 (690.125)                |
| $w_3^-$                                                                                    | 899.128 (899.141)                | $\{[\text{a}_3 - \text{C}_3] + \mathbf{1}'\}^-$                        | 1084.160 (1084.172)              |
| $w_4^-$                                                                                    | 1203.192 (1203.188)              | $[\text{a}_4 - \text{T}_4]^-$                                          | 979.162 (979.168)                |
| $w_5^-$                                                                                    | 1507.214 (1507.234)              | $[\text{a}_5 - \text{C}_5]^-$                                          | 1283.203 (1283.211)              |
| $[\text{w}_5 + \mathbf{1}']^-$                                                             | 1902.280 (1902.289)              | $\{[\text{a}_5 - \text{C}_5] + \mathbf{1}'\}^-$                        | 1678.253 (1678.266)              |
| $w_6^{2-}$                                                                                 | 897.628 (897.633)                | $[\text{a}_8 - \text{G}_8^b]^{2-}$                                     | 1089.658 (1089.672)              |
| $w_7^{2-}$                                                                                 | 1049.646 (1049.656)              | $\{[\text{a}_8 - \text{G}_8] + \mathbf{1}'\}^{2-}$                     | 1287.188 (1287.195)              |
| $[\text{w}_7 + \mathbf{1}']^{2-}$                                                          | 1247.177 (1247.188)              | $\{[\text{a}_{10} - \text{C}_{10}] + \mathbf{1}'\}^{2-}$               | 1603.749 (1603.750)              |
| $[\text{w}_7 + \mathbf{1}'_2]^{2-}$                                                        | 1444.203 (1444.211)              | $\{[\text{a}_{10} - \text{C}_{10}] + \mathbf{1}'_2\}^{2-}$             | 1800.807 (1800.773)              |
| $[\text{w}_{10} + \mathbf{1}'_2]^{2-}$                                                     | 1912.795 (1912.781)              | $\{[\text{a}_{13} - \text{C}_{13}] + \mathbf{1}'_2\}^{2-}$             | 2249.862 (2249.844)              |
| $[\text{w}_{10} + \mathbf{1}'_3]^{2-}$                                                     | 2110.333 (2110.313)              | $\{[\text{a}_{13} - \text{C}_{13}] + \mathbf{1}'_3\}^{2-}$             | 2446.894 (2446.867)              |
| $[\text{w}_{12} + \mathbf{1}'_2]^{2-}$                                                     | 2209.866 (2209.828)              | $\{[\text{a}_{15} - \text{C}_{15}] + \mathbf{1}'_3 - \text{py}\}^{3-}$ | 1802.272 (1802.258)              |
| $[\text{w}_{12} + \mathbf{1}'_3]^{2-}$                                                     | 2406.894 (2406.859)              |                                                                        |                                  |
| $[\text{w}_{14} + \mathbf{1}'_2]^{3-}$                                                     | 1670.575 (1670.585)              |                                                                        |                                  |
| $\{[\text{w}_{14} + \mathbf{1}'_2] - \text{py}\}^{3-}$                                     | 1644.210 (1644.234)              |                                                                        |                                  |
| $[\text{w}_{14} + \mathbf{1}'_3]^{3-}$                                                     | 1801.932 (1801.930)              |                                                                        |                                  |
| $\{[\text{w}_{14} + \mathbf{1}'_3] - \text{py}\}^{3-}$                                     | 1775.583 (1775.586)              |                                                                        |                                  |
| $[\mathbf{I} + \mathbf{1}'_3]^{3-}$                                                        | 1871.635 (1871.625)              | $\{[\mathbf{I} + \mathbf{1}'_2] - \text{N}_3\}^{3-}$                   | 1725.928 (1725.938)              |
| $\{[\mathbf{I} + \mathbf{1}'_3] - \text{N}_3\}^{3-}$                                       | 1857.299 (1857.289)              | $\{[\mathbf{I} + \mathbf{1}'_2] - \text{C}^c\}^{3-}$                   | 1703.255 (1703.258)              |
| $\{[\mathbf{I} + \mathbf{1}'_3] - \text{py}\}^{3-}$                                        | 1845.281 (1845.281)              | $\{[\mathbf{I} + \mathbf{1}'_2] - \text{G}^c\}^{3-}$                   | 1689.926 (1689.930)              |
| $\{[\mathbf{I} + \mathbf{1}'_3] - \text{C}\}^{3-}$                                         | 1834.620 (1834.609)              | $\{[\mathbf{I} + \mathbf{1}'_2] - \text{G} - \text{py}\}^{3-}$         | 1663.567 (1663.578)              |
| $\{[\mathbf{I} + \mathbf{1}'_3] - \text{G}\}^{3-}$                                         | 1821.273 (1821.273)              | $\{[\mathbf{I} + \mathbf{1}'_2] - \text{G} - \text{C}\}^{3-}$          | 1652.903 (1652.914)              |
| $\{[\mathbf{I} + \mathbf{1}'_3] - 2\text{py}\}^{3-}$                                       | 1818.930 (1818.928)              |                                                                        |                                  |
| $\{[\mathbf{I} + \mathbf{1}'_3] - \text{C} - \text{py}\}^{3-}$                             | 1808.267 (1808.266)              |                                                                        |                                  |
| <b>Internal fragments<sup>d</sup></b>                                                      |                                  |                                                                        |                                  |
| $[\text{T}_2:\text{T}_4]^-/[\text{C}_5:\text{T}_7]^-$<br>$[\text{C}_{10}:\text{T}_{12}]^-$ | 1074.124 (1074.133)              | $[\text{T}_x:\text{T}_x]^-$ (x=2,4,9,12,14)                            | 481.035 (481.039)                |
| $[\text{T}_2:\text{T}_7]^{2-}/[\text{T}_9:\text{T}_{14}]^{2-}$                             | 985.126 (985.133)                | $[\text{T}_4:\text{T}_7]^-/[\text{T}_9:\text{T}_{12}]^-$               | 1378.171 (1378.180)              |



|                                                      |                     |                                                                                          |                     |
|------------------------------------------------------|---------------------|------------------------------------------------------------------------------------------|---------------------|
| $\{[T_2:T_7]^{2-}/[T_9:T_{14}]^{2-} + \mathbf{1}'\}$ | 1182.652 (1182.656) | $[T_{11}:T_{14}]^-$<br>$\{[T_4:T_7]^-/[T_9:T_{12}]^-/ [T_{11}:T_{14}]^- + \mathbf{1}'\}$ | 1773.216 (1773.234) |
| $[T_6:T_7]^-/[T_{11}:T_{12}]^-$                      | 785.077 (785.086)   |                                                                                          |                     |

---

<sup>a</sup>The most abundant isotopic mass-to-charge ratio.

<sup>b</sup>T<sub>n</sub>, C<sub>n</sub> and G<sub>n</sub> represent the loss of a cytosine and a guanine base, respectively, followed by elimination of a H<sub>2</sub>O molecule to form a furan ring, n indicates the position of the base.

<sup>c</sup>C and G represent the neutral loss of a cytosine and a guanine base, respectively.

<sup>d</sup>The internal fragment B<sub>m</sub>:B<sub>n</sub> results from fragmentation at both the a- and w-sites, having a phosphate group at the 5'-terminus and a furan ring at the 3'-terminus.

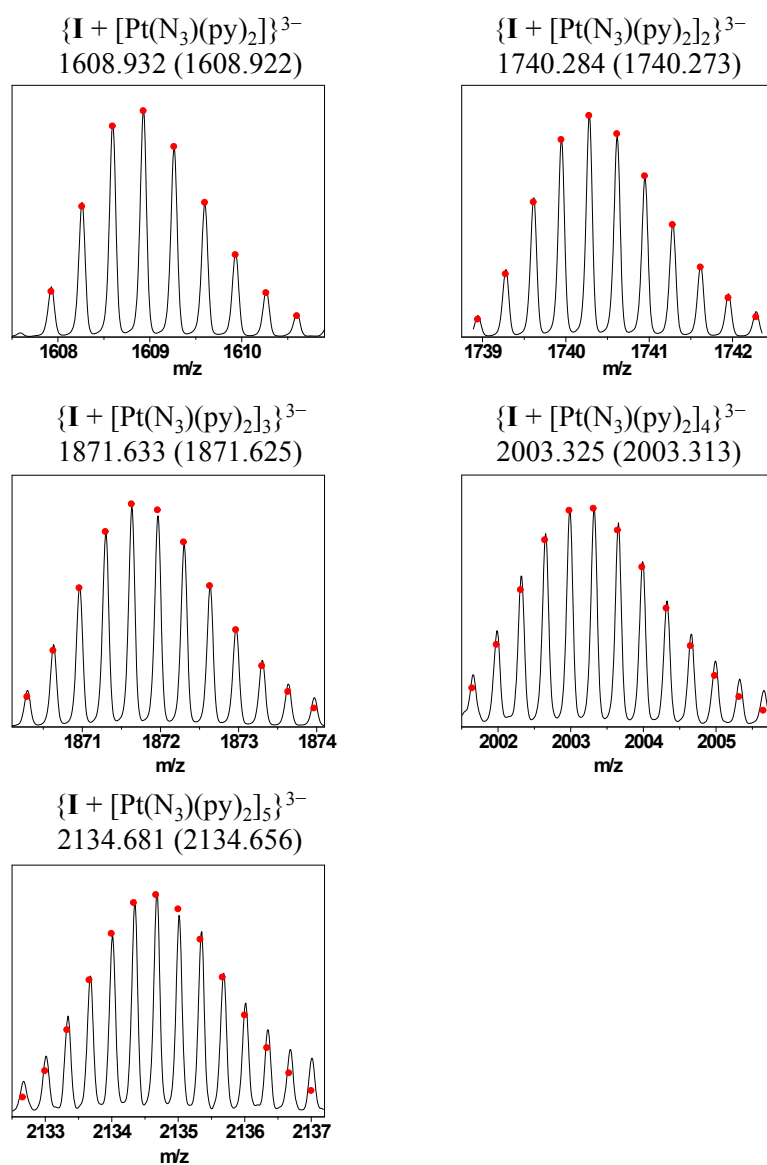

**Figure S1.** The isotopic models (dots) and mass spectra (lines) for mono-, di-, tri-, tetra- and penta-platinated ODN **I** by complex **1** from their reaction mixture after irradiation under blue light for 1 h.

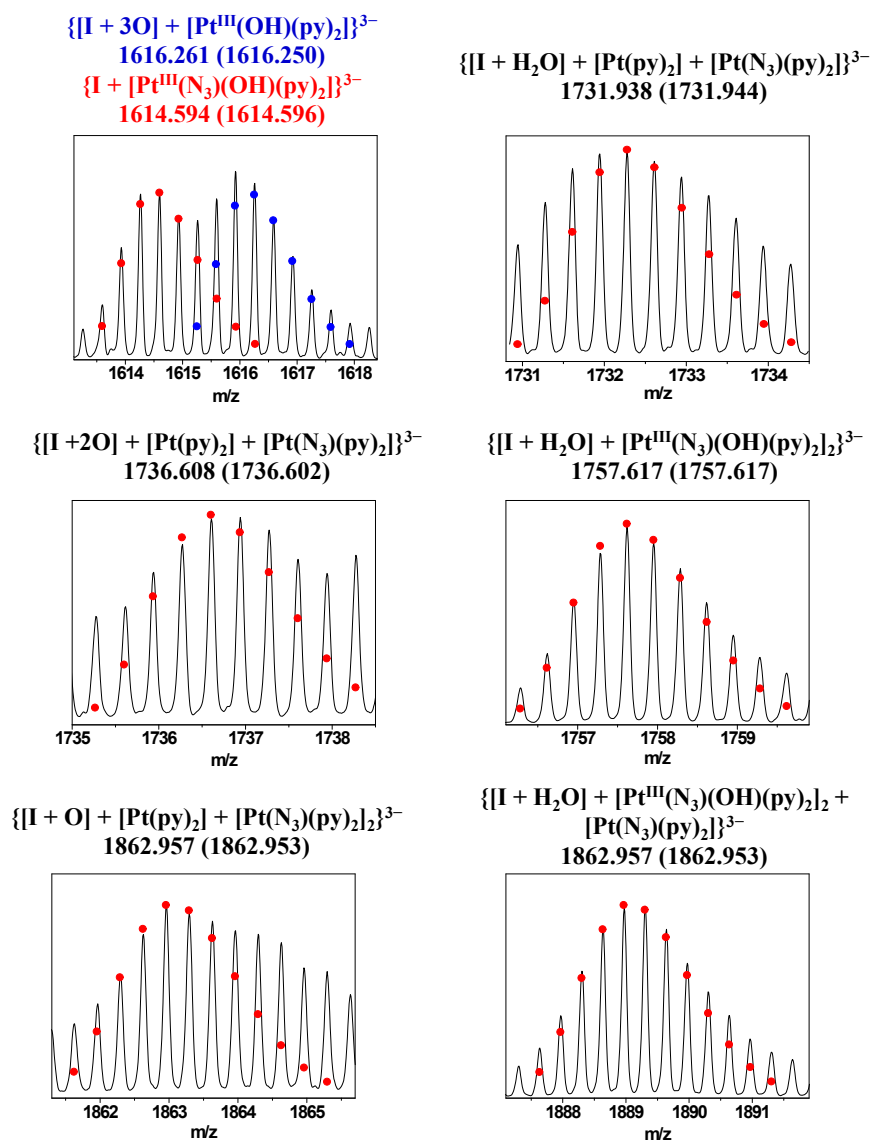

**Figure S2.** The isotopic models (dots) and mass spectra (lines) for the adducts at  $m/z$  1614.594, 1616.261, 1731.938, 1736.608, 1757.617, 1862.957 and 1888.973.

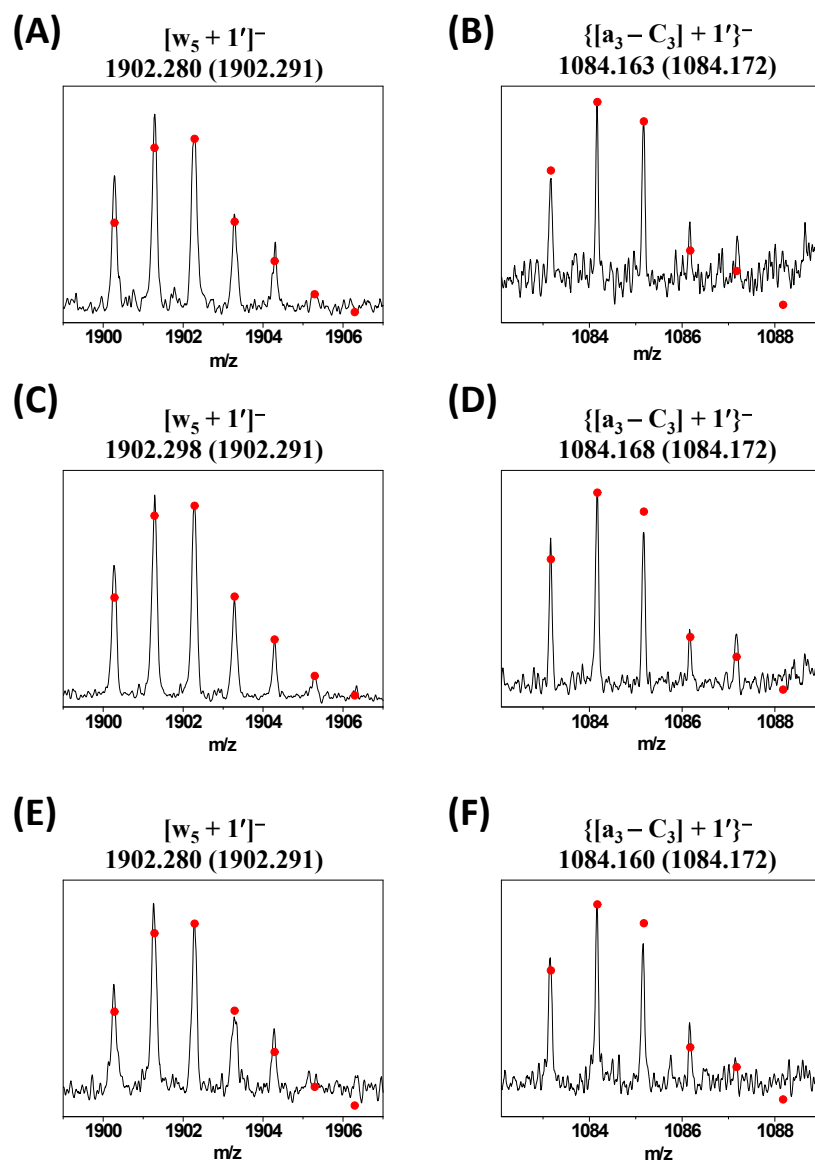

**Figure S3.** The isotopic models (dots) and mass spectra (lines) for the fragments of  $[w_5 + 1']^-$  and  $\{[a_3 - C_3] + 1'\}^-$  observed in the CID fragmentation of  $\{I + 1'\}^+$  (A, B),  $\{I + 1'_2\}^+$  (C, D) and  $\{I + 1'_3\}^+$  (E, F), respectively.  $1' = [Pt(N_3)(py)_2]^+$ .

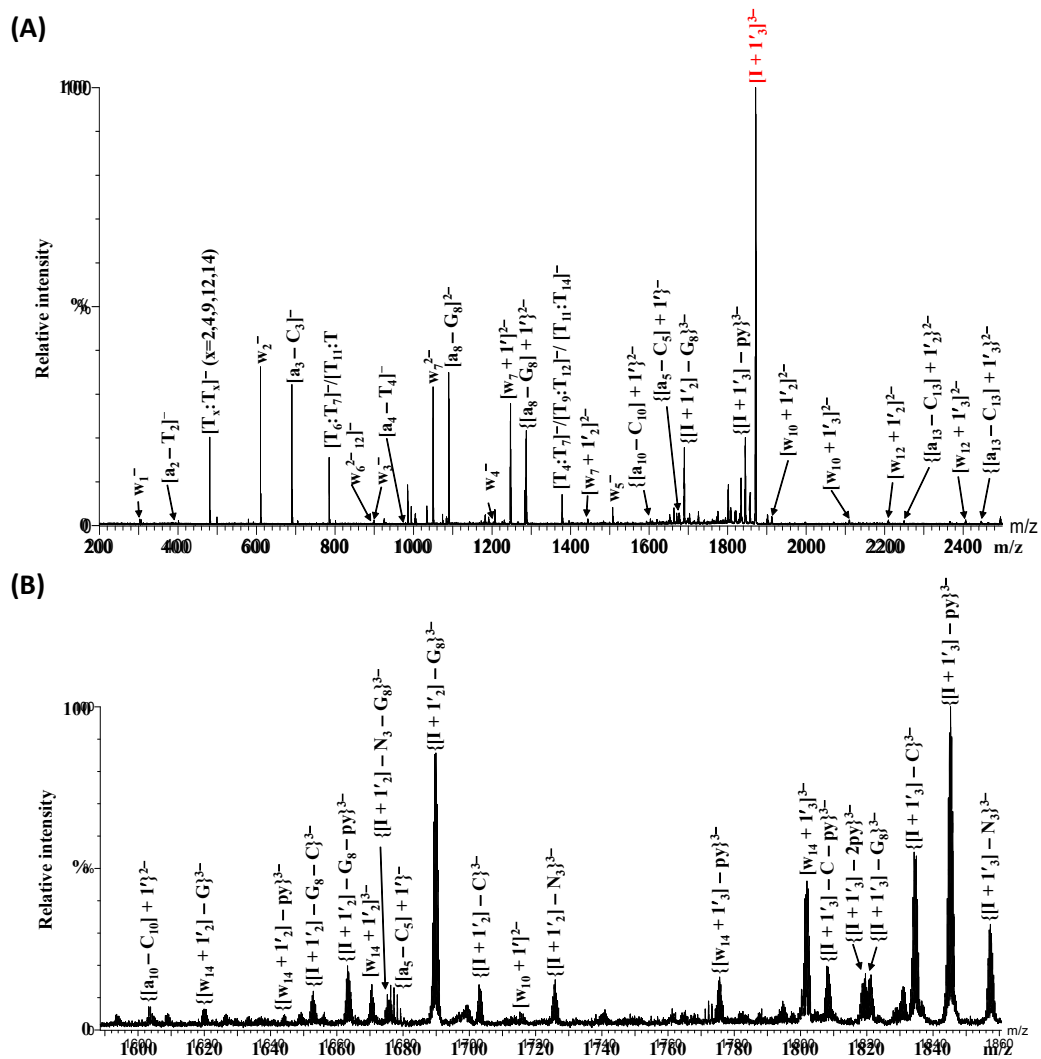

**Figure S4.** Tandem mass spectra of parent ion  $[I + 1'_3]^+$  with the parent ion shown in red (A) and the enlarged spectrum during the MS range of  $m/z$  1590-1860 (B). The corresponding MS/MS data in detail are listed in Tables S4.  $1' = [Pt(N_3)(py)_2]^+$ .
